# Supplementary material for: Sphingosine-1-phosphate expression in human epiretinal membranes
Source: PubMed Central journal article supplement (PMC9432740; doi:10.1371/journal.pone.0273674), 2022-08-31

Figure 6

Sample:  
human Muller  
glial cells  
(MIO-M1)

Method: iBright  
Imaging system

GAPDH (ab8245)

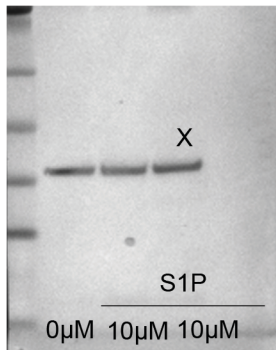

$\alpha$ -SMA (ab5694)

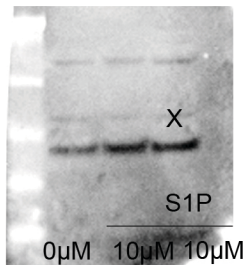

N-cadherin (ab18203)

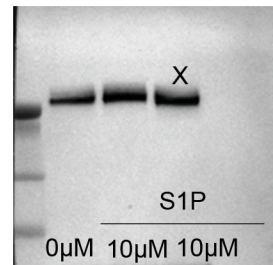

Supplemental  
Figure 1

Sample:  
human Muller  
glial cells  
(MIO-M1)

Method: iBright  
Imaging system

GAPDH (ab8245)

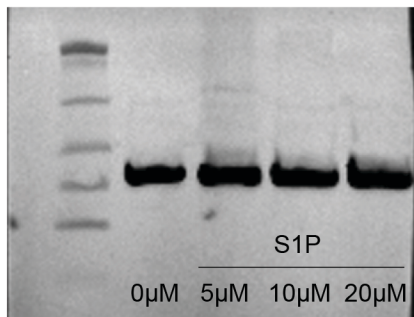

NF- $\kappa$ B (ab32536)

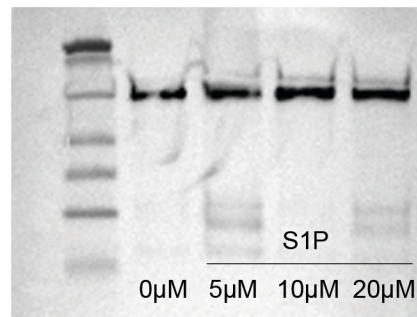

Supplement: pone.0273674.s005.pdf [file pone.0273674.s005.pdf]
